# Supplementary material for: Additive effects on the energy barrier for synaptic vesicle fusion cause supralinear effects on the vesicle fusion rate
Source: eLife journal article supplement (doi:10.7554/elife.05531), 2015-04-14
Supplement: supp [file elife-05531-supp-v1.zip]

Archive with 21 entries (21 files):
- elife_poa_e05531_Figure_3_Source_Data_1.docx
- elife_poa_e05531_Figure_2_figure_supplement_3.pdf
- elife_poa_e05531_Figure_6_figure_supplement_3.pdf
- elife_poa_e05531_Figure_7_figure_supplement_1.pdf
- elife_poa_e05531_Figure_3_figure_supplement_2.pdf
- elife_poa_e05531_Figure_3_figure_supplement_5.pdf
- elife_poa_e05531_Figure_3_Source_Data_2.docx
- elife_poa_e05531_Figure_4_Source_Data_1.docx
- elife_poa_e05531_Figure_5_Source_Data_1.docx
- elife_poa_e05531_Figure_3_figure_supplement_4.pdf
- elife_poa_e05531_Figure_4_figure_supplement_1.pdf
- elife_poa_e05531_Figure_2_figure_supplement_2.pdf
- elife_poa_e05531_Figure_6_figure_supplement_2.pdf
- elife_poa_e05531_Figure_3_figure_supplement_3.pdf
- elife_poa_e05531_Figure_2_figure_supplement_1.pdf
- elife_poa_e05531_Figure_7_Source_Data_1.docx
- elife_poa_e05531_Figure_3_figure_supplement_1.pdf
- elife_poa_e05531_Source_Code.zip
- elife_poa_e05531_Figure_2_Source_Data_1.docx
- elife_poa_e05531_Figure_6_Source_Data_1.docx
- elife_poa_e05531_Figure_6_figure_supplement_1.pdf
