# Supplementary material for: Additive effects on the energy barrier for synaptic vesicle fusion cause supralinear effects on the vesicle fusion rate
Source: eLife journal article supplement (doi:10.7554/elife.05531), 2015-04-14
Supplement: supp [file elife-05531-supp-v1.zip › elife_poa_e05531_Figure_2_figure_supplement_1.pdf]

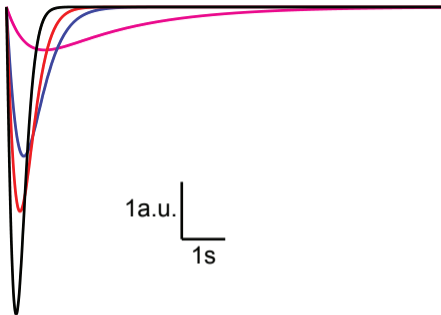

Figure 2-figure supplement 1: Analytical solution for hypertonic sucrose-induced release from a RRP without replenishment. Current responses obtained from eq. 14 after convolution with a typical mEPSC. The magenta line corresponds to  $k_{2,\max}=0.5 \text{ s}^{-1}$ , blue to  $k_{2,\max}=3 \text{ s}^{-1}$ , red to  $k_{2,\max}=5 \text{ s}^{-1}$  and black to  $k_{2,\max}=10 \text{ s}^{-1}$ .
