# Supplementary material for: Additive effects on the energy barrier for synaptic vesicle fusion cause supralinear effects on the vesicle fusion rate
Source: eLife journal article supplement (doi:10.7554/elife.05531), 2015-04-14
Supplement: supp [file elife-05531-supp-v1.zip › elife_poa_e05531_Figure_2_figure_supplement_2.pdf]

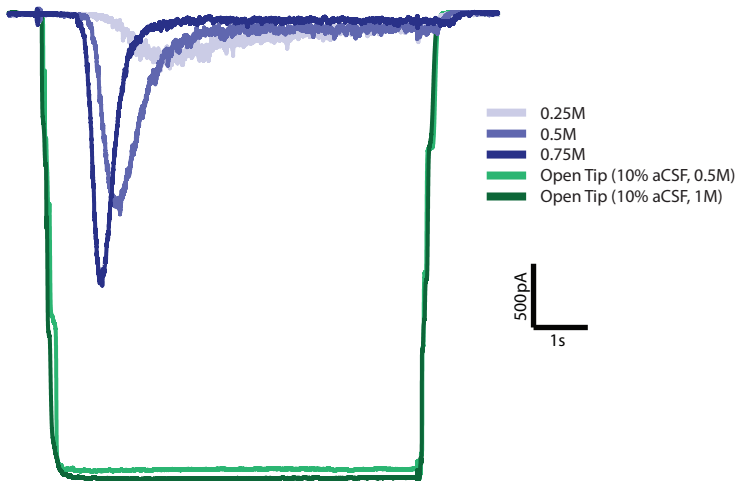

Figure 2-figure supplement 2: Open tip experiments show rapid solution exchange. Solution exchange was measured by the change in holding current when switching from normal (0.3M) extracellular solution to ten times diluted (0.03M) extracellular solution with 0.5 or 1M sucrose. Green curves are the average responses for 6 recordings, corrected for baseline and inverted for displaying purposes. Blue curves represent postsynaptic current responses to different sucrose concentrations which show a delayed response with respect to the sucrose stimulus.
