# Supplementary material for: Additive effects on the energy barrier for synaptic vesicle fusion cause supralinear effects on the vesicle fusion rate
Source: eLife journal article supplement (doi:10.7554/elife.05531), 2015-04-14
Supplement: supp [file elife-05531-supp-v1.zip › elife_poa_e05531_Figure_2_figure_supplement_3.pdf]

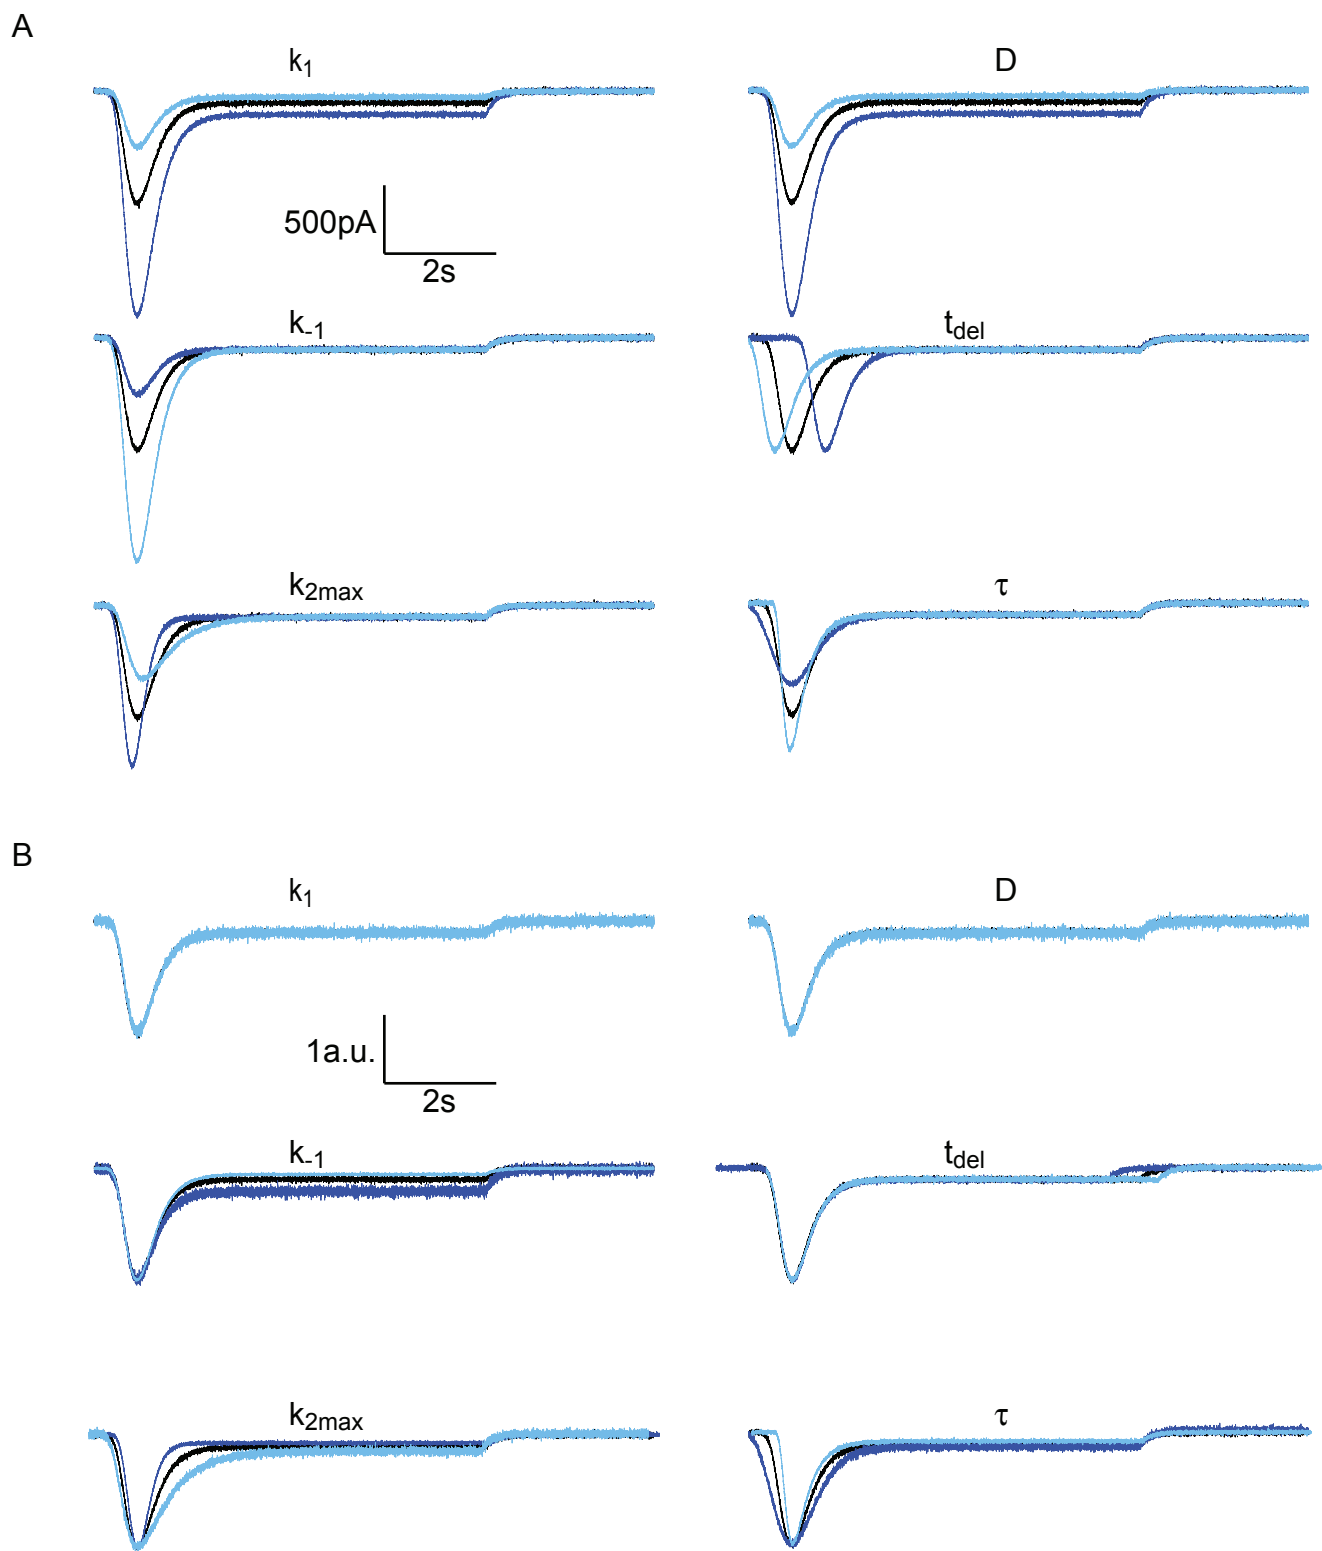

Figure 2-figure supplement 3. Effect of different model parameters on simulated HS-induced EPSCs. The default parameter set, represented by the black traces, is  $[k_1, k_{-1}, k_{2,max}, t_{del}, \tau, D] = [0.09, 0.16, 3.5, 0.60, 0.20, 1000]$ . In each subpanel, one of these parameters is either multiplied by 2 (dark blue) or divided by 2 (light blue). The Gaussian white noise added to these curves was generated using the MATLAB 'randn()' function, with  $\mu = 0\text{pA}$  and  $\sigma = 10\text{pA}$ . (A) Absolute traces. (B) Traces scaled and aligned to peak.
