# Supplementary material for: Additive effects on the energy barrier for synaptic vesicle fusion cause supralinear effects on the vesicle fusion rate
Source: eLife journal article supplement (doi:10.7554/elife.05531), 2015-04-14
Supplement: supp [file elife-05531-supp-v1.zip › elife_poa_e05531_Figure_2_Source_Data_1.docx]

**Figure 2-source data 1**

| mEPSC amplitude | 15 pA |
| --- | --- |
| mEPSC time constant rise phase | 200 s |
| mEPSC decay time constant | 3 ms |
|  | 0.5 s |
|  | 0.5, 3, 5, 10 s-1 |

**Parameter values Figure 2-figure supplement 1**

|  | 0.045, 0.09, 0.18 s-1 |
| --- | --- |
|  | 500, 1000, 2000 pC |
|  | 0.08, 0.16, 0.32 s-1 |
|  | 0.30, 0.60, 1.20 s |
|  | 1.75, 3.5, 7.0 s-1 |
|  | 0.10, 0.20, 0.40 s |

**Parameter values Figure 2-figure supplement 3**
