# Supplementary material for: Additive effects on the energy barrier for synaptic vesicle fusion cause supralinear effects on the vesicle fusion rate
Source: eLife journal article supplement (doi:10.7554/elife.05531), 2015-04-14
Supplement: supp [file elife-05531-supp-v1.zip › elife_poa_e05531_Figure_3_figure_supplement_1.pdf]

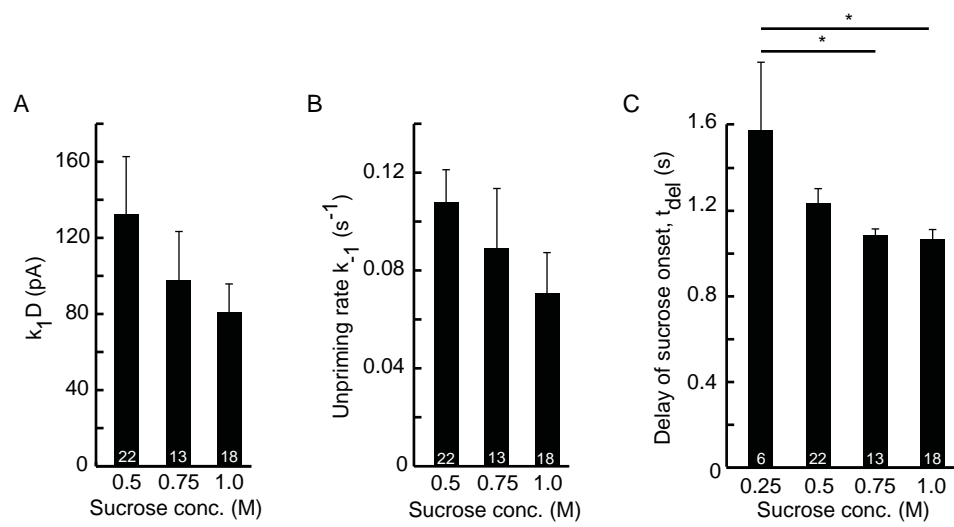

Figure 3-figure supplement 1: Higher concentrations of hypertonic do not significantly affect upstream parameters but reduce the delay of sucrose action onset with respect to time of switching of the application barrel.  
 (A) Priming rate  $k_1 D$ , (B) Unpriming rate constant  $k_{-1}$ , and (C) Delay of sucrose onset,  $t_{del}$ .
