# Supplementary material for: Additive effects on the energy barrier for synaptic vesicle fusion cause supralinear effects on the vesicle fusion rate
Source: eLife journal article supplement (doi:10.7554/elife.05531), 2015-04-14
Supplement: supp [file elife-05531-supp-v1.zip › elife_poa_e05531_Figure_3_figure_supplement_3.pdf]

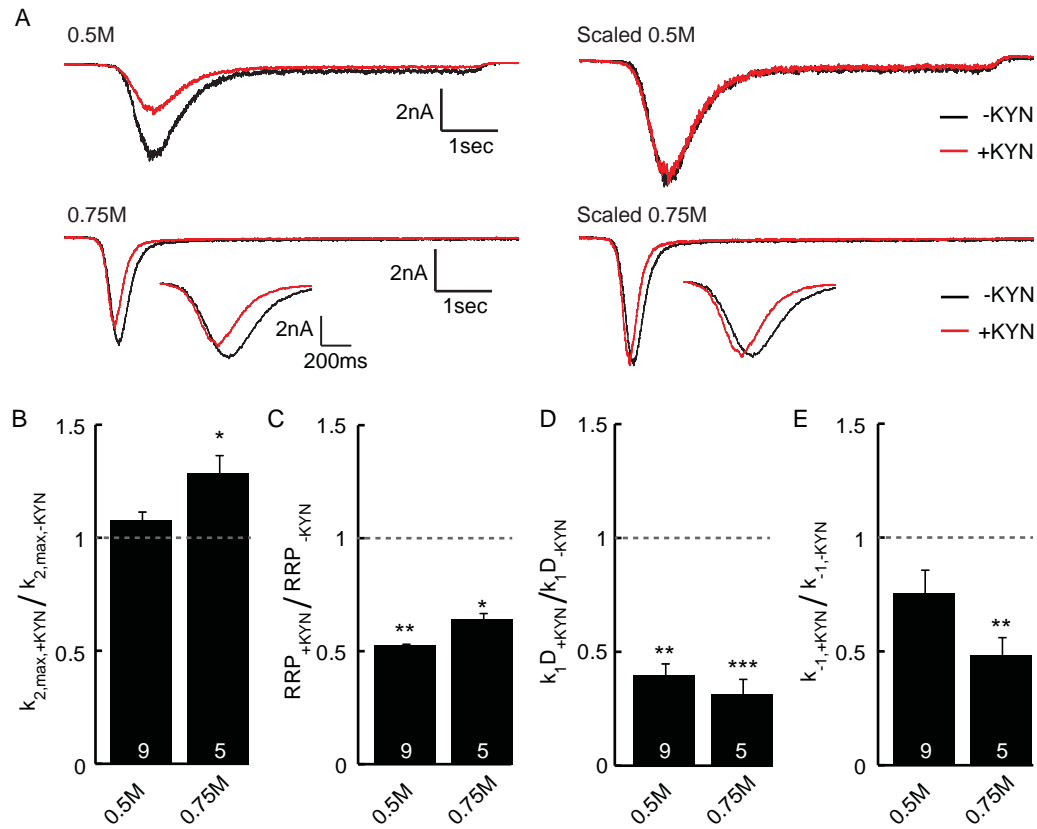

Figure 3-figure supplement 3. Effect of the non-selective glutamate receptor antagonist kynurenic acid (KYN) on release kinetics. (A) Current traces induced by 0.5 or 0.75M sucrose in the presence or absence of 0.2mM KYN (measured in the same neuron). Shown are raw and scaled traces. Insets show zoom of 0.75M peak. (B-D) KYN induced changes in (B) release rate constant  $k_{2,max}$ , (C) RRP size, (D) priming rate  $k_1 D$ , (E) unpriming rate constant  $k_{-1}$ . Parameters are obtained from unscaled raw data and normalized to the condition without KYN. Since KYN reduced the measured current, RRP size and priming rates are reduced. The maximal release rate is unaffected in 0.5M sucrose, but increased by KYN in 0.75M sucrose. This suggests that post-synaptic receptor saturation might play a role in sucrose concentrations of 0.75M or higher.
