# Supplementary material for: Additive effects on the energy barrier for synaptic vesicle fusion cause supralinear effects on the vesicle fusion rate
Source: eLife journal article supplement (doi:10.7554/elife.05531), 2015-04-14
Supplement: supp [file elife-05531-supp-v1.zip › elife_poa_e05531_Figure_3_figure_supplement_4.pdf]

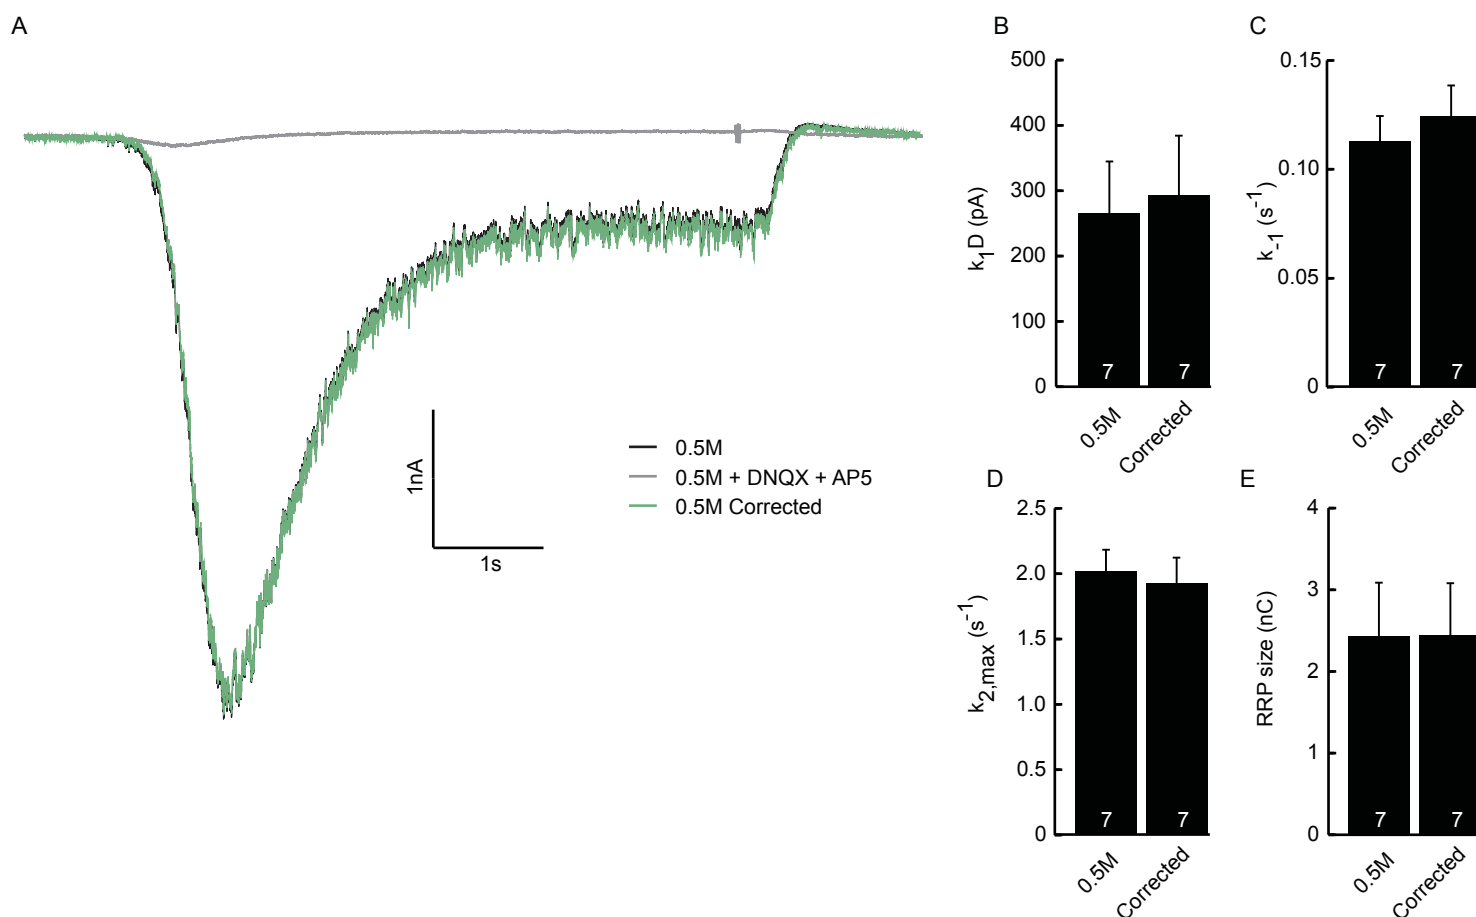

Figure 3-figure supplement 4. Subtraction of non-receptor current does not affect fitted model parameters. (A) Example trace of postsynaptic response evoked by 0.5M sucrose (black). Green trace is corrected for the non-receptor current induced by 0.5M in the presence of AMPA and NMDA blockers DNQX (10 $\mu$ M) and APV (50 $\mu$ M) (grey). (B) Priming rate  $k_{1D}$ . (C) Unpriming rate constant  $k_{-1}$ . (D) Release rate constant  $k_{2,max}$ . (E) RRP size.
