# Supplementary material for: Additive effects on the energy barrier for synaptic vesicle fusion cause supralinear effects on the vesicle fusion rate
Source: eLife journal article supplement (doi:10.7554/elife.05531), 2015-04-14
Supplement: supp [file elife-05531-supp-v1.zip › elife_poa_e05531_Figure_4_Source_Data_1.docx]

**Figure 4-source data 1**

| Model parameter | Value (unit) |
| --- | --- |
|  | 0.09 (s-1) |
|  | 0.15 (s-1) |
|  | 7.0 (nC) |
|  | 4.4 (nC) |
|  |  |
| Sucrose function parameter |  |
|  | 0.001-20 (s-1) |
|  | 0.36 (s) |
|  | 0.20 (s) |
| Duration of sucrose pulse | 7 (s) |

**Parameter values Figure 4B**

| Model parameter | Value (unit) |
| --- | --- |
|  | 0.09 (s-1) |
|  | 0.15 (s-1) |
|  | 7.0 (nC) |
|  | 4.4 (nC) |
|  |  |
| Sucrose function parameter |  |
|  | 0.01-10 (s-1) |
|  | 0.36 (s) |
|  | 0.20 (s) |
| Duration of sucrose pulse | 7 or 20 (s) |

**Parameter values Figure 4-figure supplement 1**
