# Supplementary material for: Additive effects on the energy barrier for synaptic vesicle fusion cause supralinear effects on the vesicle fusion rate
Source: eLife journal article supplement (doi:10.7554/elife.05531), 2015-04-14
Supplement: supp [file elife-05531-supp-v1.zip › elife_poa_e05531_Figure_5_Source_Data_1.docx]

**Figure 5-source data 1**

| Model parameter | Value (unit) |
| --- | --- |
|  | 0.09 (s-1) |
|  | 0.16 (s-1) |
|  | 3.0 (nC) |
|  | 1.6 (nC) |
|  |  |
| Sucrose function parameter |  |
|  | 0-30 (s-1) |
|  | 0.60 (s) |
|  | 0.20 (s) |
| Duration of sucrose pulse | 7 (s) |

**Parameter values Figure 5**
