# Supplementary material for: Additive effects on the energy barrier for synaptic vesicle fusion cause supralinear effects on the vesicle fusion rate
Source: eLife journal article supplement (doi:10.7554/elife.05531), 2015-04-14
Supplement: supp [file elife-05531-supp-v1.zip › elife_poa_e05531_Figure_6_figure_supplement_2.pdf]

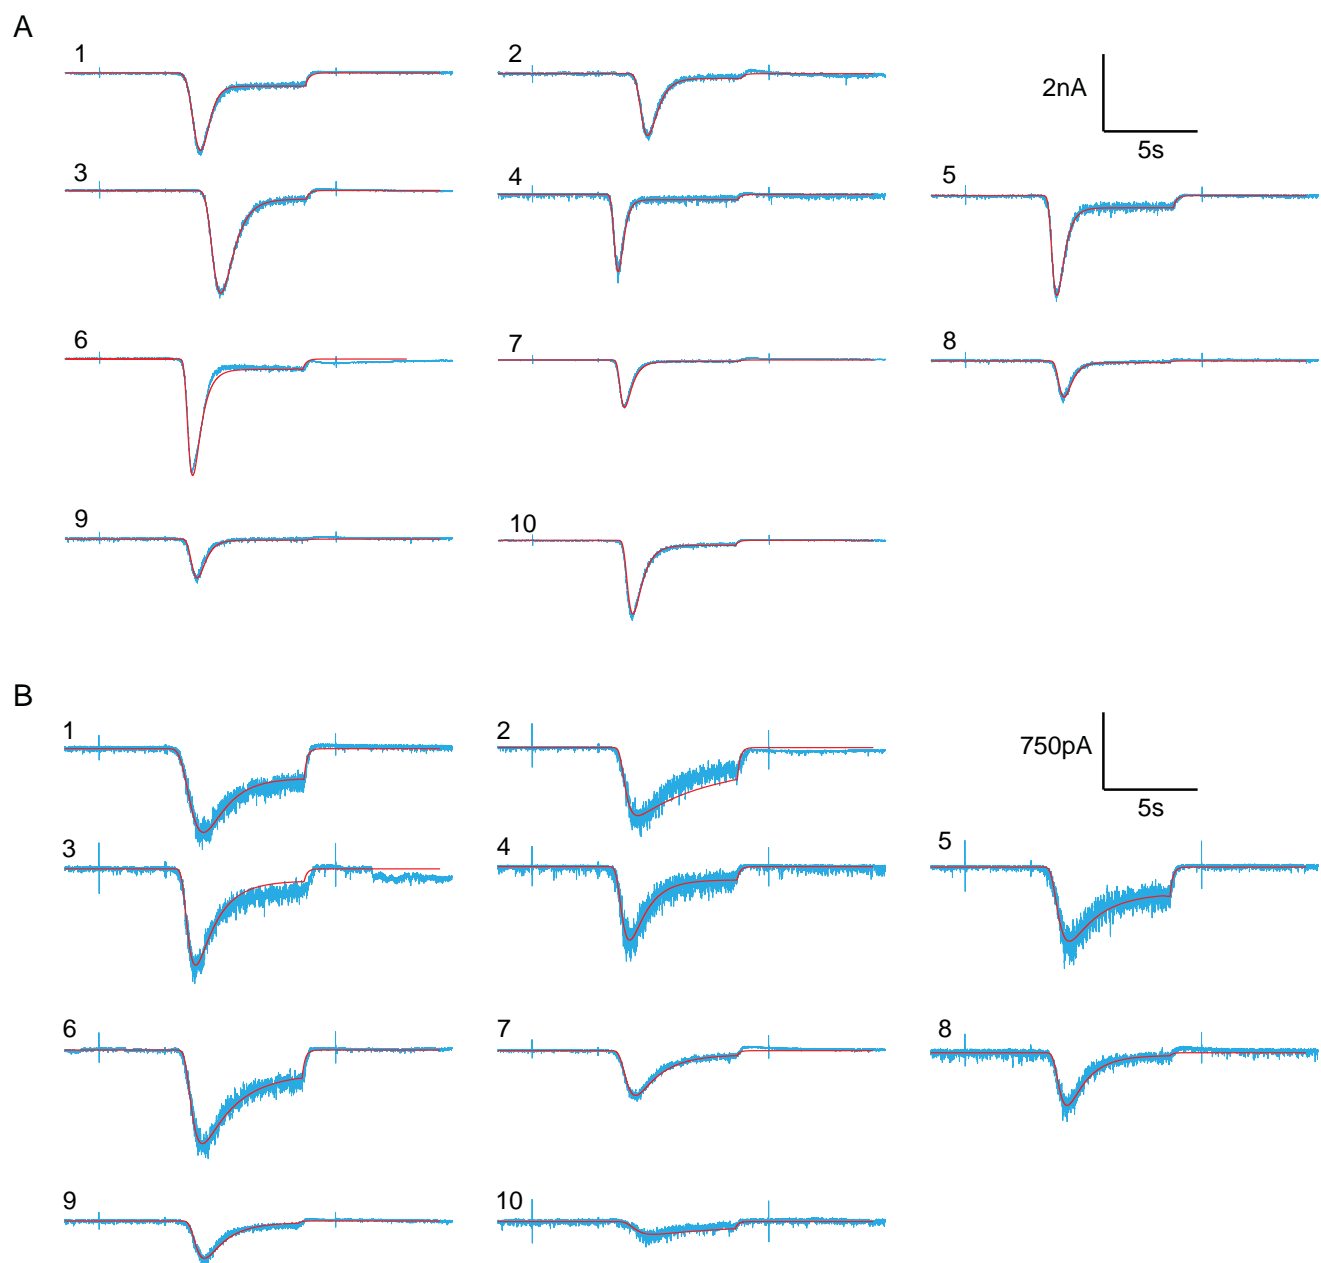

Figure 6-figure supplement 2. Random examples of individual HS-evoked EPSCs (blue) in the presence of PDBu, overlaid with their best fit (red). (A) Responses to 0.5M. (B) Responses to 0.3M.
