# Supplementary material for: Additive effects on the energy barrier for synaptic vesicle fusion cause supralinear effects on the vesicle fusion rate
Source: eLife journal article supplement (doi:10.7554/elife.05531), 2015-04-14
Supplement: supp [file elife-05531-supp-v1.zip › elife_poa_e05531_Figure_6_figure_supplement_3.pdf]

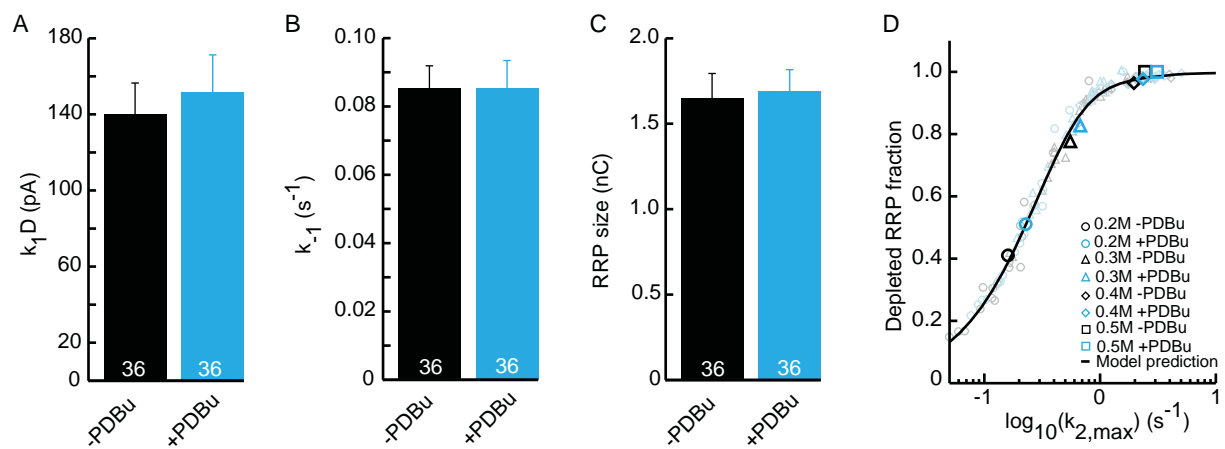

Figure 6-figure supplement 3: Upstream parameters and RRP size are not affected by PDBu application. (A) Priming rate  $k_1D$ . (B) Unpriming rate constant  $k_{-1}$ . (C) RRP size. (D) Relation between  $k_{2,max}$  and depleted RRP is maintained in the presence of PDBu, but synaptic responses to submaximal HS-stimulation display faster kinetics and more RRP depletion.
